# Supplementary material
Source: publisher figshare collection journal article supplement (https://tandf.figshare.com/ndownloader/files/16991708)
Supplement: Supplementary file 1 [file 16991708]

Supplementary material of Zhang, et al., “Evaluating the Bioequivalence of Metronidazole Tablets and Analyzing the Effect of in Vitro Dissolution on in Vivo Absorption Based on PBPK Modeling”, *Drug Development and Industrial Pharmacy*, 2019.

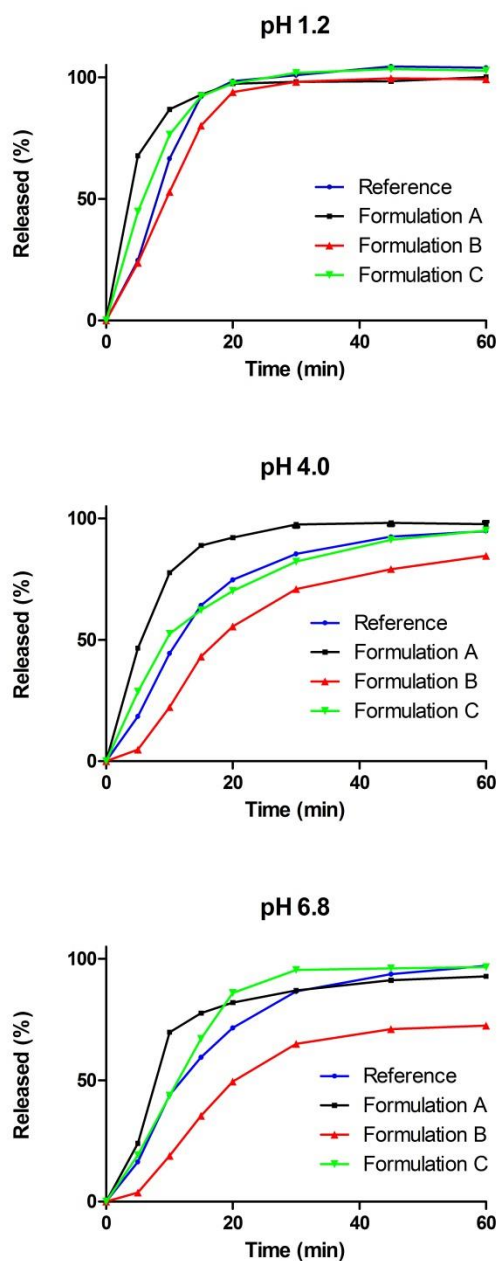

Supplementary Figure S1. Dissolution profiles of four metronidazole formulations in different media (data were presented as mean  $\pm$  SD, n = 3).

## Disintegration

The disintegration test of different Mtz formulations (6 tablets for each) were conducted in distilled water at  $37 \pm 0.5$  °C, according to China Pharmacopoeia 2015 test standard, The results were shown in Supplementary Table S1.

**Supplementary Table S1. The disintegration test of different Mtz formulations**

**(data are shown as mean  $\pm$  SD, n = 6).**

| Formulation             | Reference | A   | B   |
|-------------------------|-----------|-----|-----|
| Disintegration time (s) | 274       | 208 | 326 |
